# Supplementary material
Source: PubMed Central journal article supplement (PMC6226260)

Figure S1

A

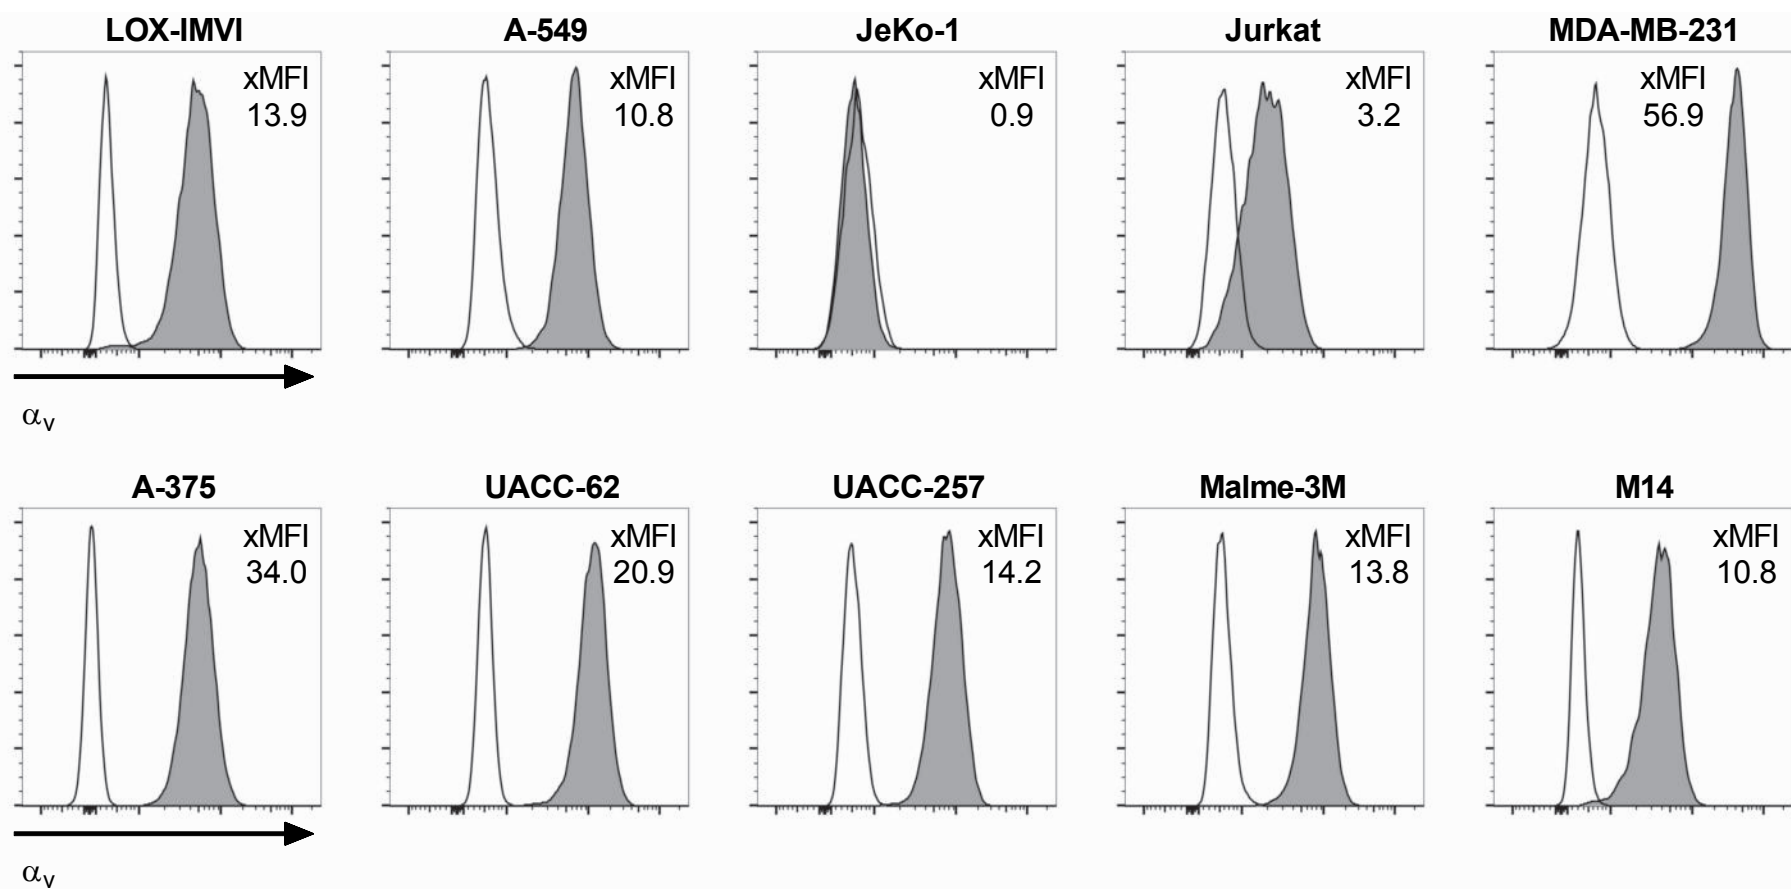

B

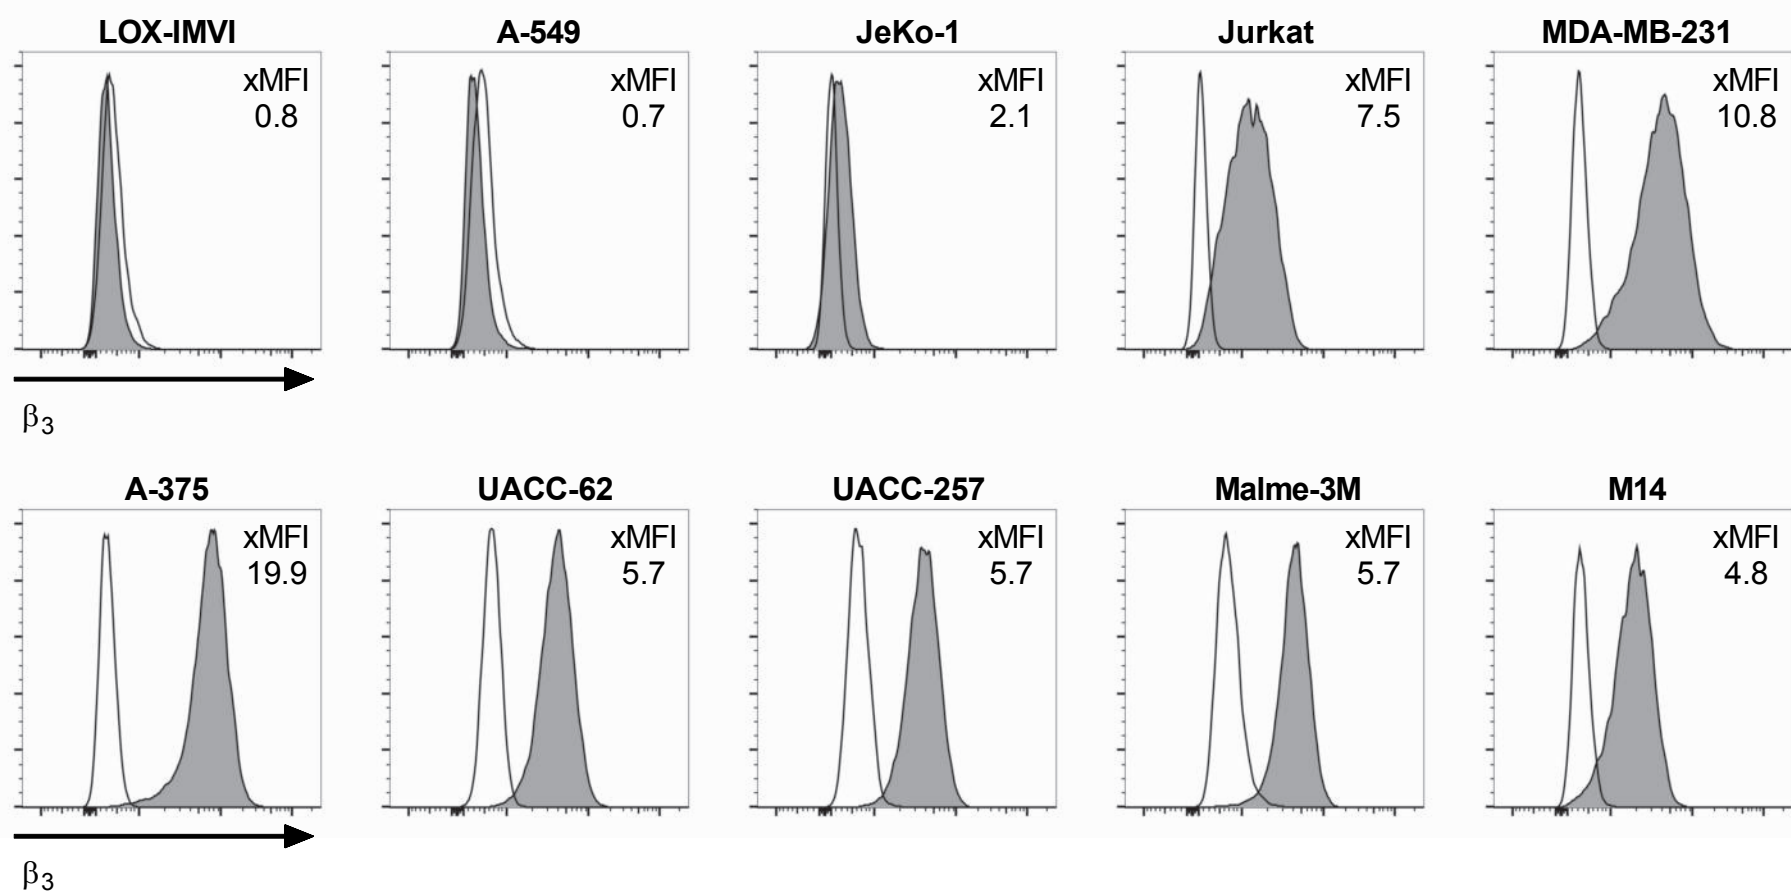

Figure S2

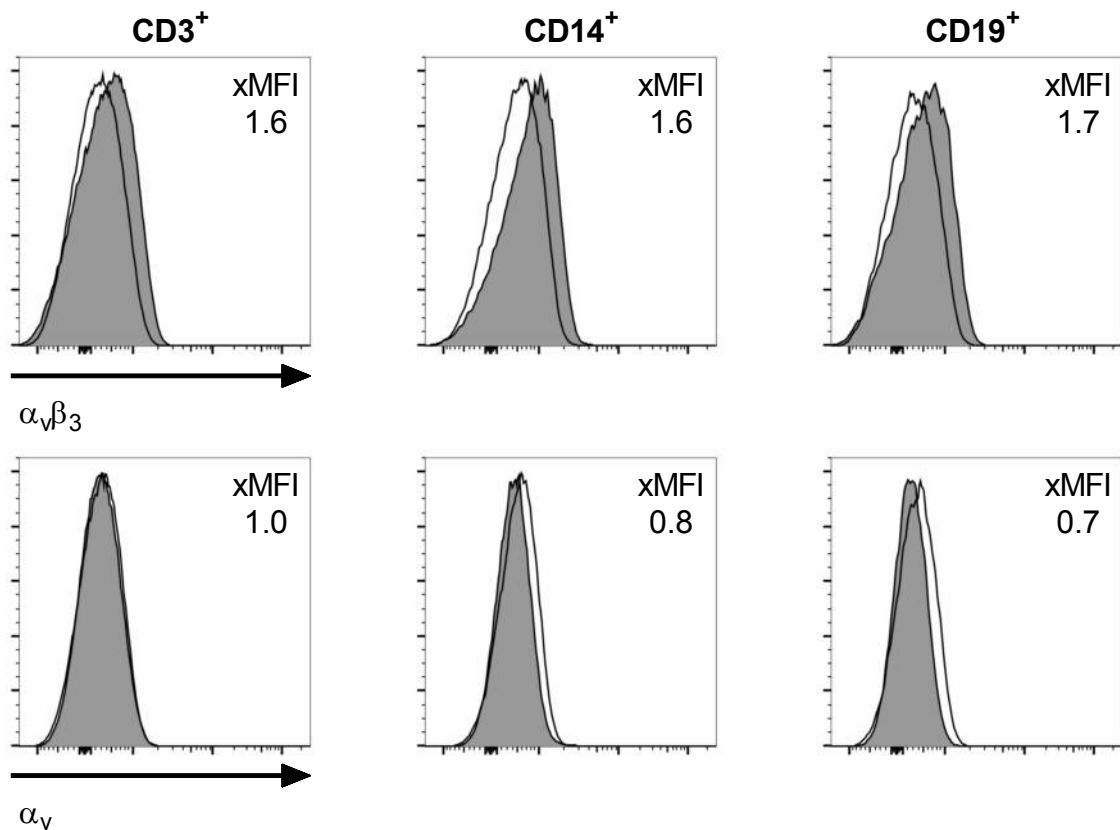

Figure S3

A

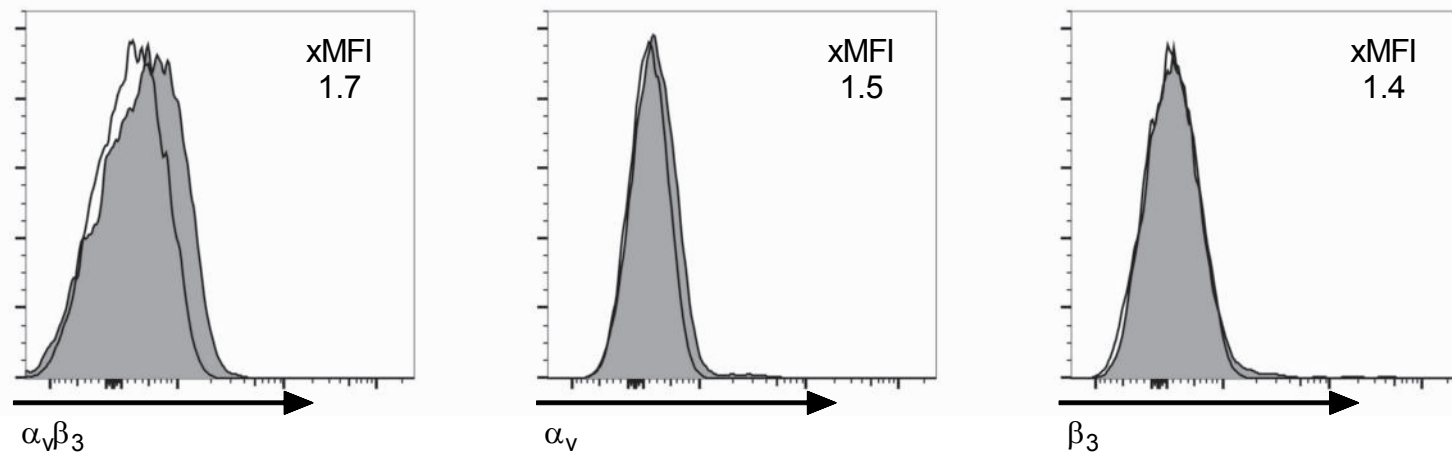

B

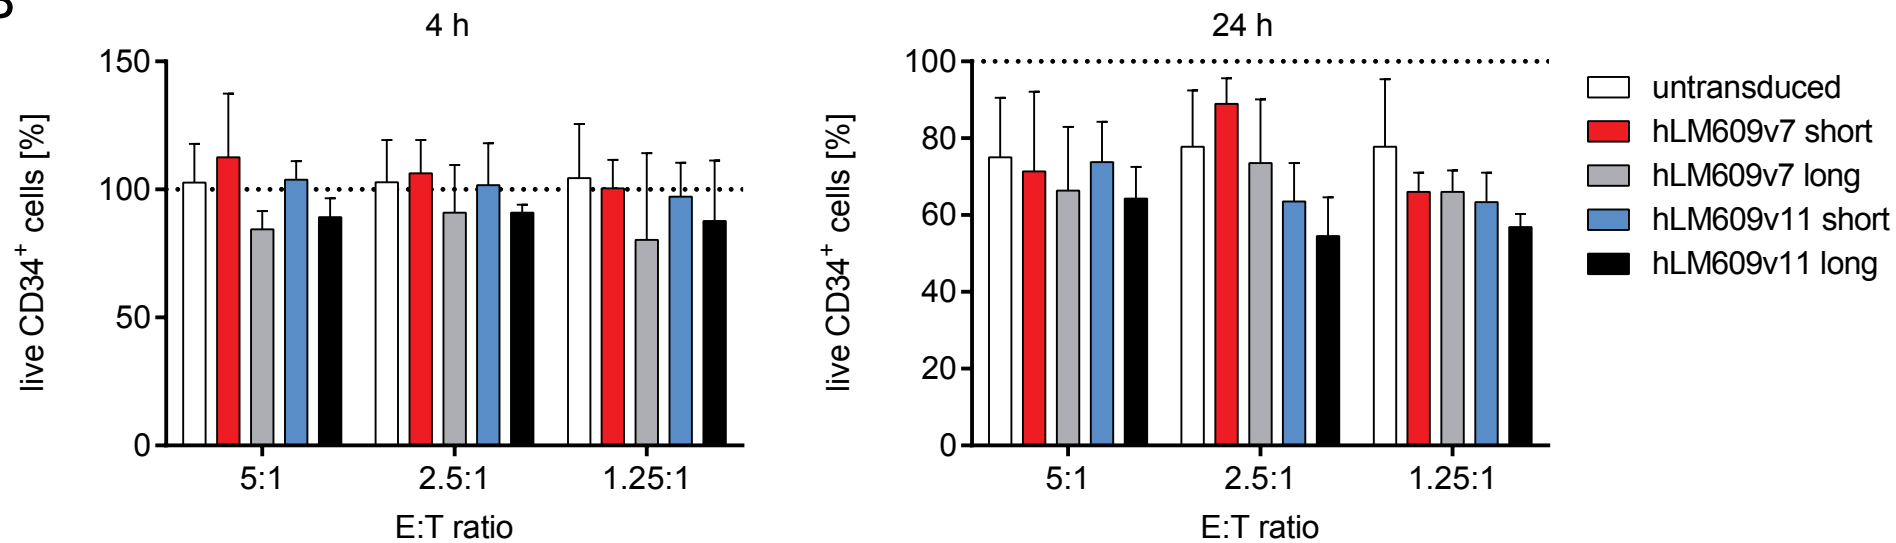

Supplement: NIHMS991863-supplement-1.pdf [file NIHMS991863-supplement-1.pdf]
